# Supplementary material for: Combinational modulations of NiSe2 nanodendrites by phase engineering and iron-doping towards an efficient oxygen evolution reaction
Source: Royal Society of Chemistry journal article supplement (doi:10.1039/d0ta00860e), 2020-01-01
Supplement: d0ta00860e1.pdf [file d0ta00860e1.pdf]

**Electronic Supplementary Information (ESI)**

**Combinational modulations of NiSe<sub>2</sub> nanodendrites by phase engineering and iron-doping towards efficient oxygen evolution reaction**

Jun Zhou,<sup>a</sup> Liwei Yuan,<sup>a</sup> Jingwen Wang,<sup>a</sup> Lingling Song,<sup>a</sup> Yu You,<sup>a</sup> Ru Zhou,<sup>b</sup> Junjun Zhang,<sup>c</sup> Jun Xu<sup>\*a</sup>

<sup>a</sup>School of Electronic Science & Applied Physics, Hefei University of Technology, Hefei, 230009, P. R. China, E-mail: [apjunxu@hfut.edu.cn](mailto:apjunxu@hfut.edu.cn)

<sup>b</sup>School of Electrical Engineering and Automation, Hefei University of Technology, Hefei, 230009, P. R. China

<sup>c</sup>School of Physics and Materials Engineering, Hefei Normal University, Hefei, 230601, P. R. China.

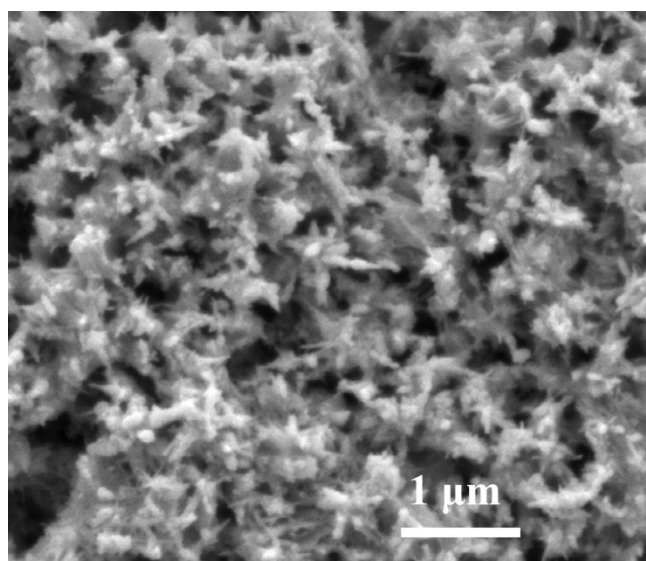

**Fig. S1** SEM image of the p-NiSe<sub>2</sub> sample.

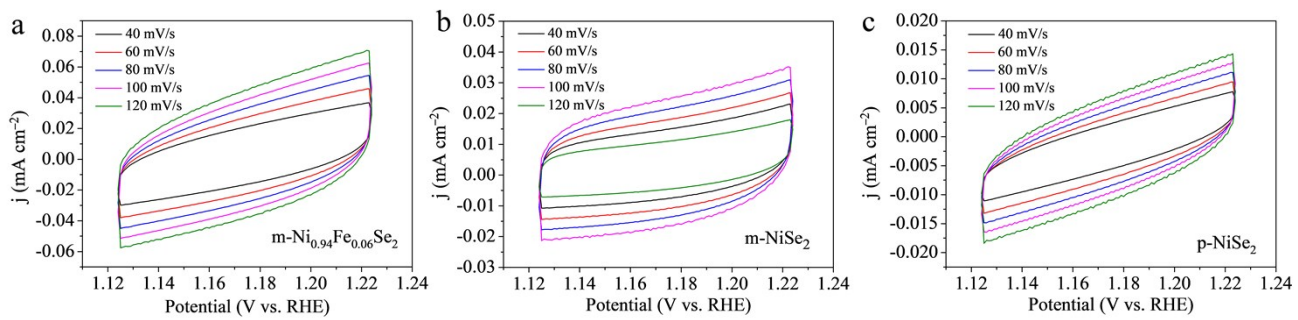

**Fig. S2** CV curves of (a)  $\text{m-Ni}_{0.94}\text{Fe}_{0.06}\text{Se}_2$ , (b)  $\text{m-NiSe}_2$ , (c)  $\text{p-NiSe}_2$  at various scan rates.

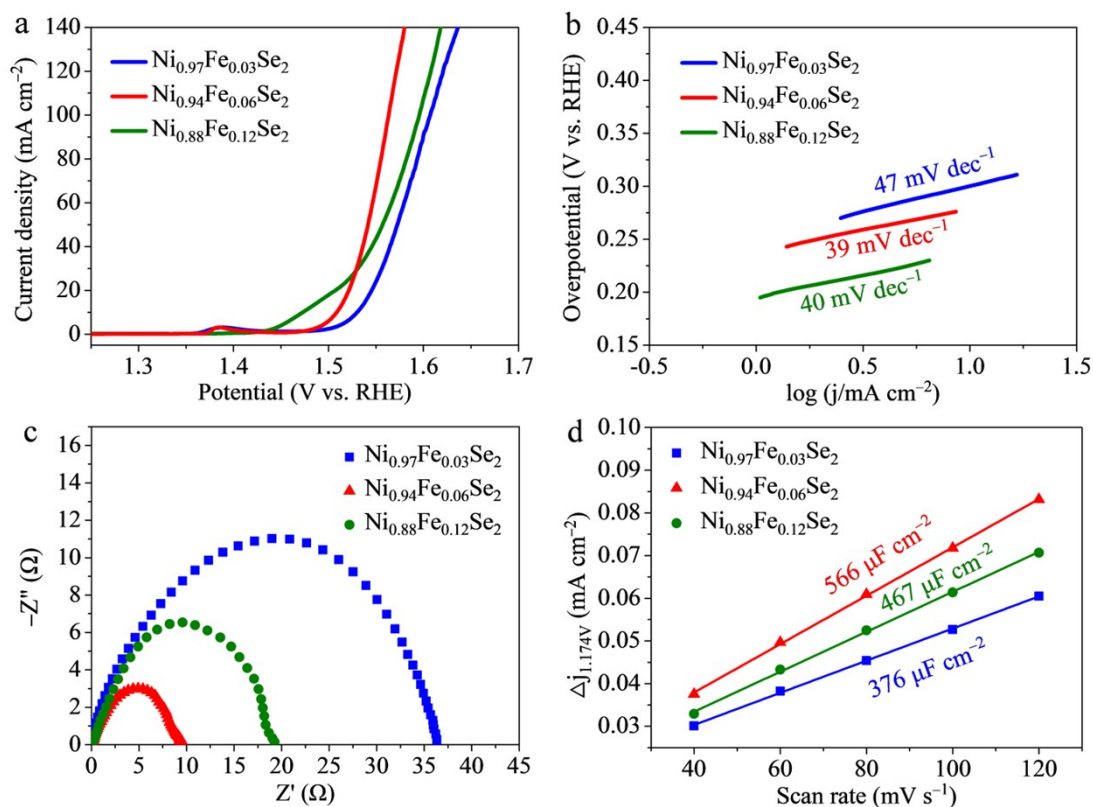

**Fig. S3** (a) Linear sweep voltammetry curves of m-Ni<sub>1-x</sub>Fe<sub>x</sub>Se<sub>2</sub> (x=0.03, x=0.06, x=0.12) catalysts recorded at a scan rate of 5 mV s<sup>-1</sup>. (b) The corresponding Tafel plots. (c) Nyquist plots of catalysts at 1.624 V (vs RHE) for the OER in 1M KOH. (d) Linear fitting of the capacitive current density of corresponding catalysts vs. scan rate.

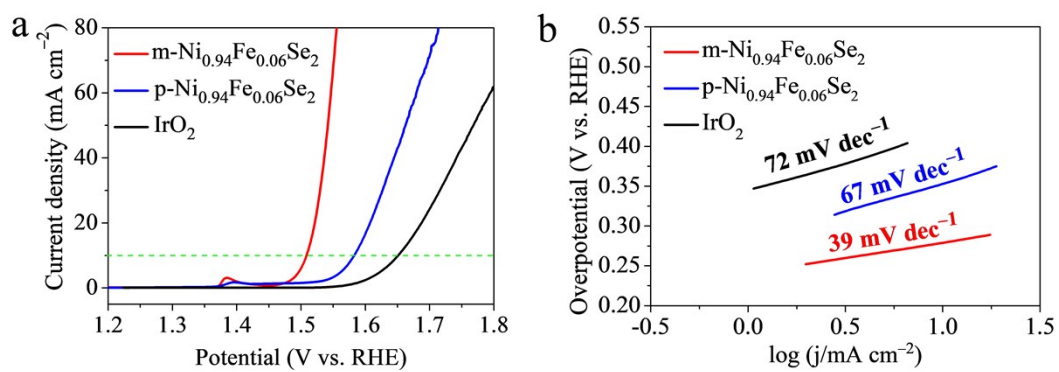

**Fig. S4** LSV polarization curves (a) and corresponding Tafel plots (b) of the m-Ni<sub>0.94</sub>Fe<sub>0.06</sub>Se<sub>2</sub>, p-Ni<sub>0.94</sub>Fe<sub>0.06</sub>Se<sub>2</sub> and the commercial IrO<sub>2</sub> catalysts.

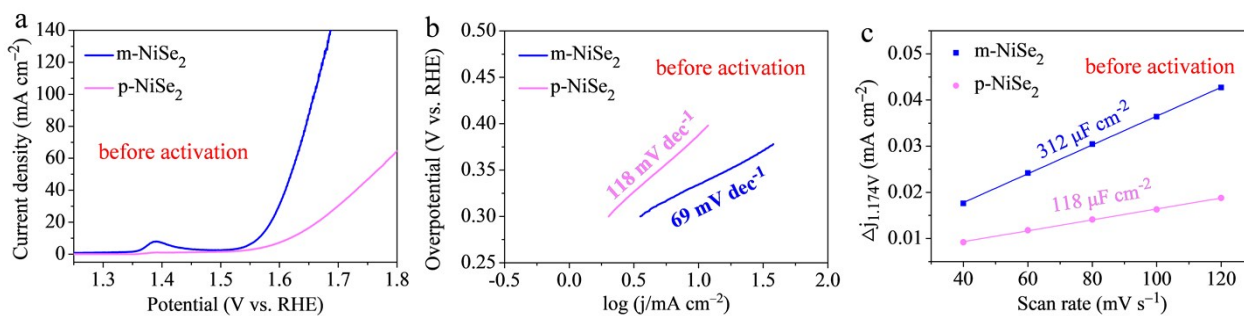

**Fig. S5** LSV polarization curves (a), Tafel plots (b), and  $C_{dl}$  estimation of the m-NiSe<sub>2</sub> and p-NiSe<sub>2</sub> catalysts before activation

The m-NiSe<sub>2</sub> is a better pre-electrocatalyst for OER than the p-NiSe<sub>2</sub>. LSV curves of the two catalysts before activation (i.e., initial CV cycling in the electrolyte) were obtained and shown in **Fig. S5a**. No amorphous NiOOH shells were formed on the surfaces of the m-NiSe<sub>2</sub> and p-NiSe<sub>2</sub> samples at this stage. It is observed that the p-NiSe<sub>2</sub> catalyst requires an overpotential of 388 mV to drive the current density of 10 mA cm<sup>-2</sup>. This overpotential is dramatically reduced to 335 mV for the m-NiSe<sub>2</sub>. **Fig. S5b** shows the corresponding Tafel slopes. It is obvious that the m-NiSe<sub>2</sub> catalyst has a Tafel slope of 69 mV dec<sup>-1</sup>, which is much smaller than that of the p-NiSe<sub>2</sub> (118 mV dec<sup>-1</sup>). In **Fig. S5c**, the  $C_{dl}$  value is 118 μF cm<sup>-2</sup> for the p-NiSe<sub>2</sub>, and increases to 312 μF cm<sup>-2</sup> for the m-NiSe<sub>2</sub>. The lower overpotential, smaller Tafel slope and larger  $C_{dl}$  value reveal that the m-NiSe<sub>2</sub> is a better pre-electrocatalyst for OER than the p-NiSe<sub>2</sub>.

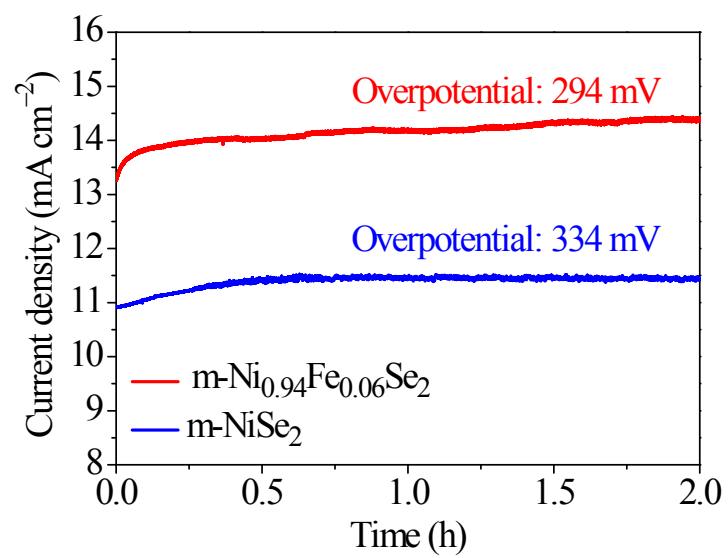

**Fig. S6** Time-dependent current density curves of the catalysts in the initial 2 h.

**Table S1** Recent advance of OER activity of Ni-based electrocatalysts.

| Catalysts                                                                              | Electrolytes | $\eta$ (mV) @<br>$j$ (mA cm <sup>-2</sup> ) | Tafel slope<br>(mV dec <sup>-1</sup> ) | Working electrodes | References                                             |
|----------------------------------------------------------------------------------------|--------------|---------------------------------------------|----------------------------------------|--------------------|--------------------------------------------------------|
| marcasite Fe <sub>1-x</sub> Ni <sub>x</sub> Se <sub>2</sub><br>nanodendrites           | 1M KOH       | 279@10<br>333@100                           | 39                                     | Glassy carbon      | This work                                              |
| pyrite Ni <sub>0.8</sub> Fe <sub>0.2</sub> Se <sub>2</sub> -drived<br>oxide nanoplates | 1M KOH       | 195@10                                      | 28                                     | Ni foam            | Nat. Commun.,<br>2016, 7, 12324.                       |
| pyrite Fe <sub>8.4%</sub> -NiSe <sub>2</sub><br>ultrathin nanowires                    | 0.1M KOH     | 268@10                                      | 41                                     | Glassy carbon      | Angew. Chem. Int.<br>Ed., 2018, 57,<br>4020–4024.      |
| pyrite Fe <sub>0.09</sub> Co <sub>0.13</sub> -NiSe <sub>2</sub><br>nanosheets          | 1M KOH       | 251@10                                      | 63                                     | Carbon fiber       | Adv. Mater., 2018,<br>30, 1802121.                     |
| pyrite Fe <sub>0.2</sub> NiSe <sub>2</sub>                                             |              | 280@10                                      | 88                                     |                    |                                                        |
| pyrite Ni <sub>0.5</sub> Fe <sub>0.5</sub> Se <sub>2</sub><br>octahedral crystalline   | 1M KOH       | 350@50                                      | 63                                     | Carbon fiber       | Appl. Surf. Sci.,<br>2017, 401, 17.                    |
| pyrite NiSe <sub>2</sub> nanowires/XC72                                                | 1M KOH       | 287@10                                      | 65                                     | Glassy carbon      | Small, 2017, 13,<br>1701487.                           |
| pyrite NiSe <sub>2</sub> /NiO <sub>x</sub> /XC72                                       |              | 266@10                                      | 53                                     |                    |                                                        |
| pyrite NiSe <sub>2</sub> nanowrinkles                                                  | 1M KOH       | 290@10                                      | 63                                     | Ni foam            | ACS Sustainable<br>Chem. Eng., 2018,<br>6, 2231–2239.  |
| NiSe@NiOOH Core/Shell<br>Hyacinth-like Nanostructures                                  | 1M KOH       | 501@100                                     | 162                                    | Ni foam            | ACS Appl. Mater.<br>Interfaces 2016, 8,<br>20057–20066 |
| Ni <sub>3</sub> Se <sub>2</sub> film/carbon fiber                                      | 1M KOH       | 284@10                                      | 80                                     | Cu foam            | Catal. Sci.<br>Technol., 2015, 5,<br>4954–4958.        |
| V-NiS <sub>2</sub> nanosheets                                                          | 1M KOH       | 290@10                                      | 45                                     | Glassy carbon      | ACS Nano 2017,<br>11, 11574–11583                      |
| NiS/NiS <sub>2</sub> interwoven<br>structure                                           | 1M KOH       | 416@100                                     | 156                                    | Carbon cloth       | J. Mater. Chem. A,<br>2018, 6, 8233-8237               |
| NiFe LDH                                                                               | 1M KOH       | 350@10                                      | 40                                     | Glassy carbon      | Nat. Commun.,<br>2014, 5, 4477.                        |



|                                             |          |        |     |               |                                                       |
|---------------------------------------------|----------|--------|-----|---------------|-------------------------------------------------------|
| FeCoNi /graphene spheres                    | 1M KOH   | 325@10 | 60  | Carbon paper  | ACS Catal., 2017, 7, 469-479.                         |
| Holey Ni(OH) <sub>2</sub> nanosheets        | 1M KOH   | 293@10 | 65  | Glassy carbon | Small 2017, 13, 1700334                               |
| Ni(OH) <sub>2</sub> nanosheets              | 1M KOH   | 330@50 | 150 | Ni foam       | ACS Appl. Mater. Interfaces, 2016, 8, 49, 33601-33607 |
| $\alpha$ -NiOOH nanosheet arrays            | 1M KOH   | 266@10 | 76  | Ni foam       | ACS Sustainable Chem. Eng., 2017, 5, 3808-3818.       |
| Ni <sub>1-x</sub> Fe <sub>x</sub> OOH films | 0.1M KOH | 320@10 | 45  | Au foil       | J. Phys. Chem. C, 2015, 119, 32, 18303-18316.         |
| Commercial RuO <sub>2</sub>                 | 1M KOH   | 344@10 | 65  | Ni foam       | ACS Appl. Mater. Interfaces, 2016, 8, 42, 28678-28688 |

Table S2 TOFs of the various catalysts.

| Catalysts                                               | TOF (s <sup>-1</sup> ) |
|---------------------------------------------------------|------------------------|
| m-NiSe <sub>2</sub>                                     | 0.97                   |
| m-Ni <sub>0.97</sub> Fe <sub>0.03</sub> Se <sub>2</sub> | 5.46                   |
| m-Ni <sub>0.94</sub> Fe <sub>0.06</sub> Se <sub>2</sub> | 10.82                  |
| m-Ni <sub>0.88</sub> Fe <sub>0.12</sub> Se <sub>2</sub> | 8.49                   |
| p-NiSe <sub>2</sub>                                     | 0.17                   |

TOF can be calculated using the below equation:

$$TOF = \frac{J \times S \times \mu}{4 \times F \times n}$$

where  $J$  (A cm<sup>-2</sup>) is the current density at a given overpotential ( $\eta = 320$  mV),  $S$  is the surface area of the electrode (0.071 cm<sup>2</sup>),  $F$  is the Faraday constant (96485 C mol<sup>-1</sup>), and  $n$  is the number of moles of reactive metal on the electrode. The  $\mu$  is the Faradaic efficiency that was determined from the total amount of charge  $Q$ (C) passed through the cell and the total amount of the produced O<sub>2</sub>  $n(O_2)$  (mol), as described by the equation

$$\mu = \frac{4 \times F \times n(O_2)}{Q}$$

, assuming the four electrons are needed to produce one oxygen molecule. Herein, we assume

the  $\mu$  values to be 100% when calculating the TOFs (*Nat. Commun.*, 2019, **10**, 2149). The Ni and Fe are supposed to be the active sites for the various samples.
